CORRECTION

# Correction: Essential Amino Acids in the Gluten-Free Diet and Serum in Relation to Depression in Patients with Celiac Disease

Nathalie J. M. van Hees, Erik J. Giltay, Susanne M. A. J. Tielemans, Johanna M. Geleijnse, Thomas Puvill, Nadine Janssen, Willem van der Does

In the Author Contributions section, Nathalie J. M. van Hees (NH), Erik J. Giltay (EG), Thomas Puvill (TP), Nadine Janssen (NJ), and Willem van der Does (WD) all should be listed as one of the persons who wrote the paper. The correct contributions are: Conceived and designed the experiments: NH EG WD. Performed the experiments: NH TP NJ. Analyzed the data: NH EG TP NJ WD ST. Contributed reagents/materials/analysis tools: ST JG. Wrote the paper: NH EG WD TP NJ ST JG.

## Reference

1. van Hees NJM, Giltay EJ, Tielemans SMAJ, Geleijnse JM, Puvill T, Janssen N, et al. (2015) Essential Amino Acids in the Gluten-Free Diet and Serum in Relation to Depression in Patients with Celiac Disease. PLoS ONE 10(4): e0122619. doi: [10.1371/journal.pone.0122619](https://doi.org/10.1371/journal.pone.0122619) PMID: [25884227](https://pubmed.ncbi.nlm.nih.gov/25884227/)

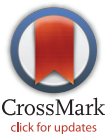

## OPEN ACCESS

**Citation:** van Hees NJM, Giltay EJ, Tielemans SMAJ, Geleijnse JM, Puvill T, Janssen N, et al. (2015) Correction: Essential Amino Acids in the Gluten-Free Diet and Serum in Relation to Depression in Patients with Celiac Disease. PLoS ONE 10(6): e0129640. doi:10.1371/journal.pone.0129640

**Published:** June 3, 2015

**Copyright:** © 2015 van Hees et al. This is an open access article distributed under the terms of the [Creative Commons Attribution License](https://creativecommons.org/licenses/by/4.0/), which permits unrestricted use, distribution, and reproduction in any medium, provided the original author and source are credited.
